# Supplementary material for: Amino-terminated PAMAM dendrimers electrostatically uptake numerous anionic indicators
Source: Royal Society of Chemistry journal article supplement (doi:10.1039/b925229k), 2010-01-01
Supplement: b925229k.pdf [file b925229k.pdf]

# Supporting Information

## AT-PAMAM Dendrimers Electrostatically Uptake Numerous Anionic Indicators

*J. Chance Rainwater and Eric V. Anslyn\**

Absorption spectra were collected using a Beckman Coulter DU 800 spectrophotometer. PV and PGR were obtained from Sigma Aldrich, and 5-carboxyfluorescein and fluorescein were purchased from Molecular Probes and the dendrimers were purchased from Dendritech, Inc.

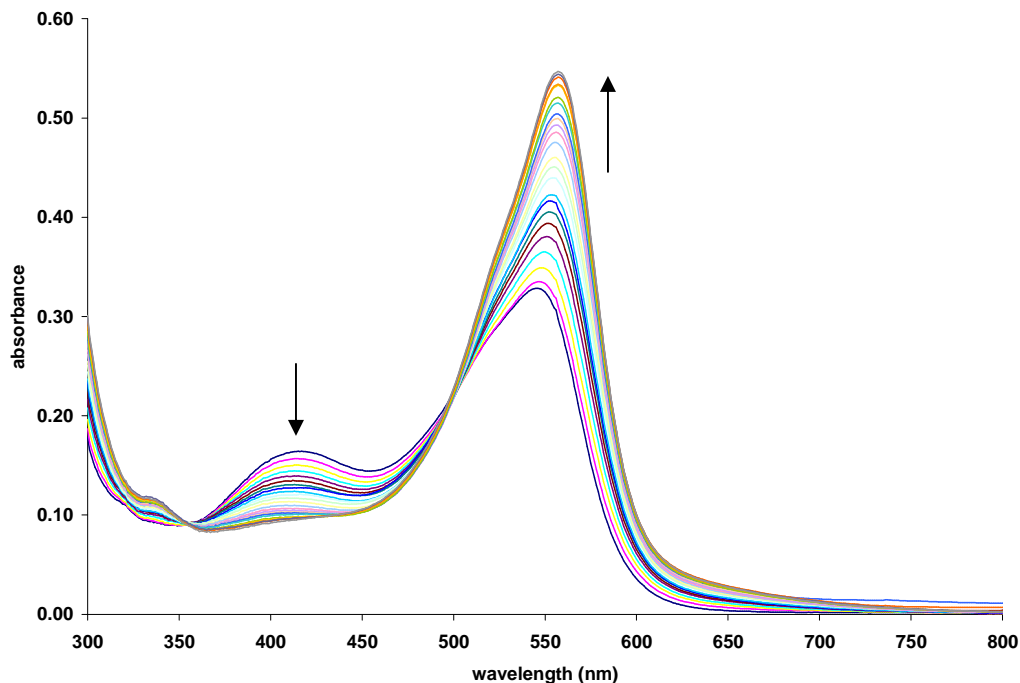

Absorption modulation of 20 μM PGR in 1:1 MeOH:H<sub>2</sub>O (buffered with 25 mM HEPES) upon titration with G4 AT-PAMAM. pH of the solution ranged from 7.1 to 7.2 over the course of the titration.

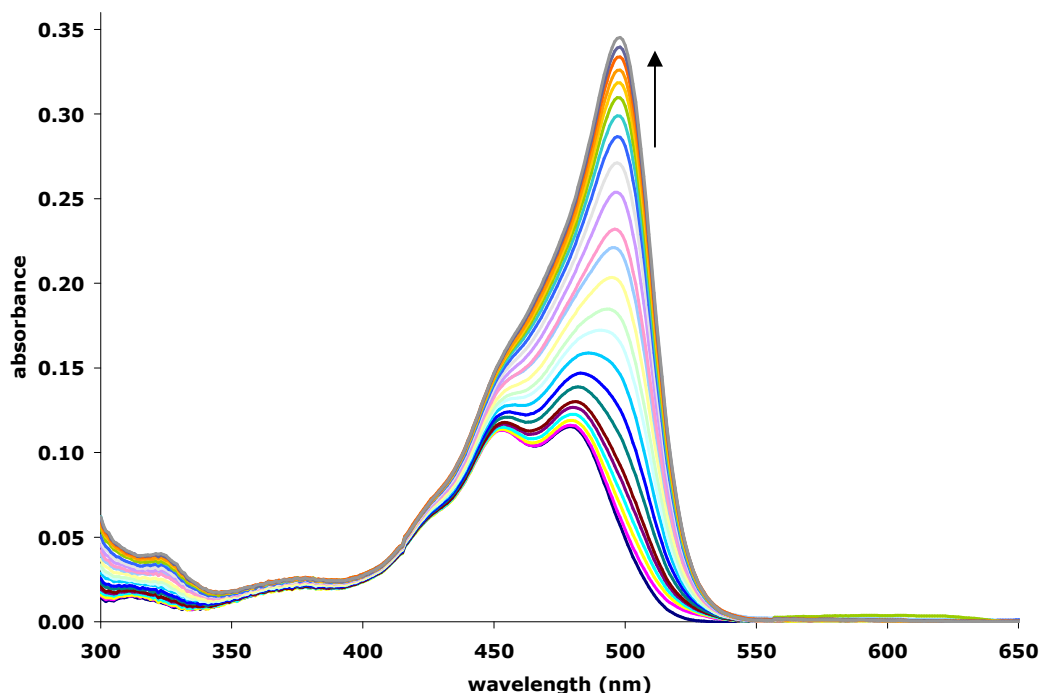

Absorption modulation of 20 μM fluorescein in 95:5 MeOH:H<sub>2</sub>O (buffered with 25 mM HEPES) upon titration with G4 AT-PAMAM. pH of the solution ranged from 6.8 to 6.9 over the course of the titration.
